# Supplementary material for: Elucidation of Genetic Interactions in the Yeast GATA-Factor Network Using Bayesian Model Selection
Source: PLOS journal article supplement (doi:10.1371/journal.pcbi.1004784), 2016-03-11
Supplement: S2 (10.1371/journal.pcbi.1004784.s002) [file journal.pcbi.1004784.s002]

## S2 Text. Detailed experimental procedures.

### 1. Experimental data for model verification

**Strains.** The prototrophic *Saccharomyces cerevisiae* haploid strain FY4 MATa was used as reference strain. Single gene deletion strains were used from a collection in FY4 isogenic background with the KanMX cassette replacing the Open Reading Frame as in the BY-deletion collection (see Table “Strains employed in the reporter-GFP analysis”). FY4 cells from glycerol stocks were plated in YPD agar plates. Deletion strains from glycerol stocks were plated in YPD agar plates with 300 mg/L of geneticin (G418).

#### Strains employed in the reporter-GFP analysis

| Strain Name            | Genotype                       | Reference |
|------------------------|--------------------------------|-----------|
| FY4 (reference strain) | FY4 MATa                       | [1]       |
| $\Delta dal80$         | FY4 MATa DAL80/YKR034W::kanMX4 | C. Boone* |
| $\Delta gat1$          | FY4 MATa GAT1/YFL021W::kanMX4  | C.Boone*  |
| $\Delta gln3$          | FY4 MATa GLN3/YER040W::kanMX4  | C.Boone*  |
| $\Delta gzf3$          | FY4 MATa GZF3/YJL110C::kanMX4  | C.Boone*  |

\* Kindly supplied by Prof. Charlie Boone (University of Toronto, Canada)

**Gene synthesis and plasmid construction.** Nucleotide sequences containing the promoter region of each of the GATA coding genes (-600 to -1 bp upstream the beginning of the ORF according to the sequence in SGD) immediately upstream of the yeast enhanced GFP gene (yEGFP3 as in [2]; GFP sequence taken from the sequence of plasmid pKT127 [3]), followed by the native terminator of the yeast CDC28 gene (yCDC28t) were designed (see section 2. Custom-designed sequences below) and synthesized by GeneArt AG (Regensburg, Germany). The custom-designed sequences were cloned into the vector pRS41H [4] using the restriction enzymes NotI and Sall, thereafter generating the plasmids pRS41H\_pDAL80-GFP, pRS41H\_pGAT1-GFP, pRS41H\_pGLN3-GFP and pRS41H\_pGZF3-GFP (see Table “Vector and plasmids employed in the reporter-GFP analysis”). The inserted sequences were verified by sequencing. The expected plasmid size was verified by digestion with NdeI, which generated the two expected fragments including one cut inside the inserted sequence.

### Vector and plasmids employed in the reporter-GFP analysis

| Plasmid           | Vector; Insert                                             | Insert description                           | Reference  |
|-------------------|------------------------------------------------------------|----------------------------------------------|------------|
| pRS41H            | pRS41H (features: <i>CEN</i> , <i>HygR</i> , <i>AmpR</i> ) | empty vector; for background correction      | [4], *     |
| pRS41H_pDAL80-GFP | pRS41H; pDAL80(-600,-1) + yEGFP3 + yCDC28t                 | <i>DAL80</i> native promote, upstream of GFP | This study |
| pRS41H_pGAT1-GFP  | pRS41H; pGAT1(-600,-1) + yEGFP3 + yCDC28t                  | <i>GAT1</i> native promoter, upstream of GFP | This study |
| pRS41H_pGLN3-GFP  | pRS41H; pGLN3(-600,-1) + yEGFP3 + yCDC28t                  | <i>GLN3</i> native promoter, upstream of GFP | This study |
| pRS41H_pGZF3-GFP  | pRS41H; pGZF3(-600,-1) + yEGFP3 + yCDC28t                  | <i>GZF3</i> native promoter, upstream of GFP | This study |

\* Kindly supplied by Prof. Michael Knop (Heidelberg University, Germany)

**Plasmid propagation and yeast transformations.** The constructed plasmids were transformed by electroporation into *Escherichia coli* DH5 $\alpha$ , transformed cells were selected in LB plates with ampicillin, and plasmids were recovered and purified by standard Mini-Prep kits. After verification by sequencing and digestion, each plasmid was transformed into *S. cerevisiae* using a lithium-acetate transformation protocol, including a 4-6 hour growth in YPD for expression of the Hygromycin resistance gene as described in [4]. Transformed yeast cells were plated into selective YPD agar plates with 300 mg/L hygromycin B.

**Media composition.** The Yeast Minimal Medium (YMM) used in precultures and main cultures was based on [5], with a few modifications. The basis of the minimal mineral medium, excluding a nitrogen- and a carbon-source, contained the following components per Liter: 5g K<sub>2</sub>SO<sub>4</sub>, 3g KH<sub>2</sub>PO<sub>4</sub>, 0.5g MgSO<sub>4</sub>•7H<sub>2</sub>O, 15mg EDTA, 4.5mg ZnSO<sub>4</sub>•7H<sub>2</sub>O, 0.3mg CoCl<sub>2</sub>•6H<sub>2</sub>O, 1.0mg MnCl<sub>2</sub>•4H<sub>2</sub>O, 0.3mg CuSO<sub>4</sub>•5H<sub>2</sub>O, 4.5mg CaCl<sub>2</sub>•2H<sub>2</sub>O, 3.0mg FeSO<sub>4</sub>•7H<sub>2</sub>O, 0.4mg NaMoO<sub>4</sub>•2H<sub>2</sub>O, 1.0mg H<sub>3</sub>BO<sub>3</sub>, 0.1mg KI, , 0.05mg biotin, 1.0mg calcium pantothenate, 1.0mg nicotinic acid, 25mg inositol, 1.0mg pyridoxine, 0.2mg p-aminobenzoic acid, 1.0mg thiamin, and 10 mM potassium hydrogen phthalate buffer (pH 5). All culture media were supplemented with D-glucose to a final concentration of 20 g/L and hygromycin B to a final concentration of 300 mg/L. Nitrogen source supplementation was as followed at the beginning of the cultures: “pre-culture-YMM” was supplemented with 1 g/L of ammonium sulfate; “glutamine-YMM” was supplemented with 0.5 g/L of L-glutamine; and “proline-YMM” was supplemented with 0.78 g/L of L-proline.

**Cultivation conditions and induction of dynamic shifts.** One single colony from freshly transformed yeast strains was pre-inoculated into 3-mL of “pre-culture-YMM” and grown for 20-24 hours at 30 °C until saturation. Afterwards, 10-20 µL of pre-inoculum was inoculated into 1.5 mL of the appropriate media within each well of a 48-well microtiter Flower plate (m2p labs, Aachen, Germany), thereafter sealed with Gas Permeable Adhesive seals (Thermo Scientific, Surrey, UK). The microtiter plate was incubated into a BioLector device (m2p-labs, Aachen, Germany) [6], set for 30°C temperature, 1000 rpm shaking frequency, 95% humidity (controlled), and reading scattered light (620 nm, Gain: 25) and GFP (excitation: 488 nm/ emission: 520 nm, gain: 100) signals every 5-7 minutes. Biomass and GFP evolution was monitored online via the Biolection software.

For the rapamycin pulse, yeast strains were initially inoculated into “glutamine-YMM”. When cells achieved a mid-exponential growth as estimated from the online monitoring readings, Biolector was paused, the plate removed and a 30x concentrated stock of rapamycin was added to each well to a final concentration of 400 µg/L. Biolector monitoring was resumed within 3 minutes after pausing. For the proline->glutamine upshift, yeast strains were initially inoculated into “proline-YMM”. As before, when cells achieved a mid-exponential growth, a 30x concentrated stock of L-glutamine was added to each well to a final concentration of 0.5 g/L.

## 2. Custom-designed DNA fragments

Custom-designed DNA fragments containing each of the GATA promoters upstream of a yeast enhanced GFP (yEGFP), followed by the terminator of *CDC28* yeast gene were designed as follows.

Restriction site's enzymes: NotI XmaI BamHI HindIII Sall

> pDAL80(-600,-1) + yEGFP3 + yCDC28t

```
GTTGTTGGGCGGCTCCGGGTGGATCCTCTGGTCTCGAATTTACTCTACTTCTTCAGTCACCGATCTATCTGC
CTGAGGTGGAGCGAAGTGAGTTCCAGACGCTGTTGACACGTTAGACATCACCTTGTATCTATCCTACCTTTTCT
TCTTGCGTACGTGCCTCTCAATGCGTCGTGTGAATTATCAGTGACCGGTCGTGCCTATAATGTCCTGCTAATTTCC
ACTAAATCTTTCCCATGGCGTATTCATCGTTATGTTTGTGCTTTTGTTCACCCAAAGGGCTGTAGCAATCTTCAC
CCGTTTGTGCTTGATAACGAGTTTCCACCTTATCACTTATCACTAGTGCTAATCAAACAGCAAAGAATGCTTGATAG
AAACCGATCCTGGGCTTATCTCGCTGCATTGTGGCGGCATCCCTGGACTGTAATCAGCAAGTGTTGCTTAGTATAT
ATATACATCCAGCGTCAGCTTGAATTTGGATACAGTTACTGTTTTTTCGATTTTCTTGGTTATTCTTTCTGAGACA
GTAGTAATTTGTATTACTGAGCGGGATATTGTTTATCTGCCGTCATACTATATTACATTATATTATATCATATTATA
TATAAGAGAAATGTCTAAAGGTGAAGAATTATTCAGTGGTGTGTTGCCAATTTTGGTTGAATTAGATGGTGATGTTA
ATGGTCACAAATTTTCTGTCTCCGGTGAAGGTGAAGGTGATGCTACTTACGGTAAATTGACCTTAAATTTATTTGT
ACTACTGGTAAATTGCCAGTTCCATGGCCAACCTTAGTCACTACTTTAACTTATGGTGTTCAATGTTTTTCTAGATAC
CCAGATCATATGAAACAACATGACTTTTTCAAGTCTGCCATGCCAGAAGGTTATGTTCAAGAAAGAAGTATTTTTTT
CAAAGATGACGGTAACTACAAGACCAGAGCTGAAGTCAAGTTGAAGGTGATACCTTAGTTAATAGAATCGAATT
AAAAGGTATTGATTTTAAAGAAGATGGTAACATTTTAGGTACAAATTGGAATACAACCTATAACTCTCACAATGTTT
ACATCATGGCTGACAAACAAAAGAATGGTATCAAAGTTAACTTCAAATTAGACACAACATTGAAGATGGTCTGTG
TCAATTAGCTGACCATTATCAACAAAATACTCCAATTGGTGATGGTCCAGTCTTGTTACCAGACAACCATTACTTAT
CCTCAATCTGCCTTATCCAAAGATCCAAACGAAAAGAGAGACCACATGGTCTTGTTAGAATTTGTTACTGCTGCT
GGTATTACCCATGGTATGGATGAATTGTACAAATAAAGCTTGCATTATAATCTATTTGCTATTATATTACAAATG
CTACTGCACTGTCATTATAGCCTAGTAAAGTATATAGTGAATACAATATACTCAGTTTCAACATTATGATGGGTAAC
TCCATCAGAAAATATATTCATCGTCATATACGGAACATTAGTTATACGCGAAAGTAAAAGTGAGAGCTTTTCAGG
GGTTAAAAGCTGGGCGTGTTCCATGACGTATTTACCGAGGTCGTATTATCAAAGAAAATGAAAAAAAAAAAAAAAA
AAAAAAAAAGCGAAGAGGAAAAAGACAAACGAAAAACAAAACGAAATAACGCATTGTATGCTGGGGCCTCAATT
GAACCTCTTTGACGTCGACAACAAC
```

> pGAT1(-600,-1) + yEGFP3 + yCDC28t

GTTGTTGGGGCGCTCCCGGTGGATCCCGCTTTCCGATTTAGCCGGCGAAGACGTACTTGGCGCCATAATCA  
AAACCTAGCTTGCCCAATACTTCTGAGTTCTACGTGGTGCAAAAATATTTTTTTTTTTGAAAAACCTACCCTATTT  
CATTATAGATGCATCCATCAGTATTACGGTGTCTCACACAACCCTGTCTCTGCACAACGTAATACCTCCTTTCCCG  
TCTGCTAGCTCTCATTTGCGGTAATCCAACCTCAACCAGCAACCCGGATCTTCTATACGCAGTCCGGTGTGTGGGT  
GCATGACTGATTGGTCCGGCCGATAACAGGTGTGCTTGACCCAGTGCCCAACGTCAACAAAGCAGGAACAACGG  
GCTGATAAGGGAGAAGATAAGATAAGATAAGATAACAAATCATTGCGTCCGACCACAGGCCGACACATAGCAGA  
ACGATGTGAAGCAGCGCAGCATAGTGTAGTGCCGGTGCAGCTACCGCTGGTATTAACAGCCACCACAATACAGA  
GCAACAATAATAACAGCACTATGAGTCGCACACTTGCCGTGCCCGGCCAGCCACATATATATAGGTGTGTGCCAC  
TCCCGGCCCCGGTATTAGCATGTCTAAAGGTGAAGAATTATTTACTGGTGTGTGCCAATTTGGTTGAATTAGATG  
GTGATGTTAATGGTCACAAATTTTCTGTCTCCGGTGAAGGTGAAGGTGATGCTACTTACGGTAAATTGACCTTAA  
ATTTATTTGTACTACTGGTAAATTGCCAGTTCCATGGCCAACCTTAGTCACTACTTTAACTTATGGTGTTCATGTTT  
TTCTAGATACCCAGATCATATGAAACAACATGACTTTTTCAAGTCTGCCATGCCAGAAGGTTATGTTCAAGAAAGA  
ACTATTTTTTTCAAAGATGACGGTAACTACAAGACCAGAGCTGAAGTCAAGTTGAAGGTGATACCTTAGTTAATA  
GAATCGAATTAAGGTATTGATTTAAAGAAGATGGTAACATTTTAGGTCACAAATTGGAATACAACATAACTC  
TCACAATGTTTACATCATGGCTGACAAACAAAAGAATGGTATCAAAGTTAACTTCAAATTAGACACAACATTGAA  
GATGGTTCTGTTCAATTAGCTGACCATTATCAACAAAATACTCCAATTGGTGATGGTCCAGTCTTGTACCAGACAA  
CCATTACTTATCCACTCAATCTGCCTTATCCAAAGATCCAAACGAAAAGAGAGACCACATGGTCTTGTAGAAATTTG  
TACTGCTGCTGGTATTACCATGGTATGGATGAATTGTACAAATAAAGCTTGCATTATAATCTATTTGCTATTAT  
ATTACAAATGCTACTGCACTGTCATTATAGCCTAGTAAAGTATATAGTGAATACAATATACTCAGTTTCAACATTAT  
GATGGGTAACCTCATCAGAAAATATATTCATCGTCATATACGGAACATTCAGTTATACGCGAAAGTAAAAGTGAGA  
GCTTTTCAGGGGTTAAAGCTGGGCGTGTTCATGACGTATTTACCGAGGTCGTATTATCAAAGAAAATGAAAAA  
AAAAAAAAAAAAAAAAAAGCGAAGAGGAAAAAGACAAACGAAAAACAAAACGAAATAACGCATTGTATGCTG  
GGCCTCAATTGAACTCTTTGACGTCGACAACAAC

> GLN3(-600,-1) + yEGFP3 + yCDC28t

GTTGTTGGGGCGCTCCCGGTGGATCCGTATAAATCATCAATACGAGCAGCAAAGAAATTGGAAACCAGTTTTTT  
ACATCTGTCTGTTCAAAGATCAAAAATTAGCAACGCCTACAATTCGTAGGATACATAGCGTCACAGTGACACCA  
GTGATTGTACAAACAACATCACAAAGTTCATGTTAAAGTTGTCCAGGTTAACCACGAATTTGTTGTTACTGTCTC  
AAAATCGAGGACGCGCAGTAAGATAAGATTGAAGCCGGCCAGAGTTGGCCACTGATTCCGTCCATTTCATGCTTA  
TGCTTGCTCATAATTACCACACCTTCTTGATCTCTTACAGCTTTTCAACCTTCCATTCTTGACTCTATCTCTACCTGG  
CCCTTTAAACATTCTTAATATGATATATTCACATTTTTGCTCTATTACCCGGCGGACAGGTTCCCGAAAGAAAGTG  
ACATGGCAATGCTGAGAGAGTGGAAAGAGTCATCTTGCAAGACAGAGAAAGATGTTCAAGAGTGGTAAGCTAAT  
GTCAGCGCAGTAGCCCATCCACAATAACAGAGTGTGTAAGAAAGAGAGACGAGAGAGAGACAGGGCCCCCTT  
TTCCCCACCAACAAACAAATGTCTAAAGGTGAAGAATTATTTACTGGTGTGTGCCAATTTGGTTGAATTAGATG  
GTGATGTTAATGGTCACAAATTTTCTGTCTCCGGTGAAGGTGAAGGTGATGCTACTTACGGTAAATTGACCTTAA  
ATTTATTTGTACTACTGGTAAATTGCCAGTTCCATGGCCAACCTTAGTCACTACTTTAACTTATGGTGTTCATGTTT

TTCTAGATACCCAGATCATATGAAACAACATGACTTTTTCAAGTCTGCCATGCCAGAAGGTTATGTTCAAGAAAGA  
ACTATTTTTTTCAAAGATGACGGTAACTACAAGACCAGAGCTGAAGTCAAGTTTGAAGGTGATACCTTAGTTAATA  
GAATCGAATTAAGGTATTGATTTAAAGAAGATGGTAACATTTAGGTCACAAATTGGAATACAACTATAACTC  
TCACAATGTTTACATCATGGCTGACAAACAAAAGAATGGTATCAAAGTTAACTTCAAATTAGACACAACATTGAA  
GATGGTTCTGTTCAATTAGCTGACCATTATCAACAAAATACTCCAATTGGTGATGGTCCAGTCTTGTACCAGACAA  
CCATTACTTATCCACTCAATCTGCCTTATCCAAAGATCCAAACGAAAAGAGAGACCACATGGTCTTGTAGAAATTTG  
TTACTGCTGCTGGTATTACCCATGGTATGGATGAATTGTACAAATAAAGCTTGCATTATAATCTATTTTCGTATTAT  
ATTACAAATGCTACTGCACTGTCATTATAGCCTAGTAAAGTATATAGTGAATACAATATACTCAGTTTCAACATTAT  
GATGGGTAACCTCATCAGAAAATATATTCATCGTCATATACGGAACATTCAGTTATACGCGAAAGTAAAAGTGAGA  
GCTTTTCAGGGGTAAAAGCTGGGCGTGTTCCATGACGTATTTACCGAGGTCGTATTATCAAAGAAAATGAAAAA  
AAAAAAAAAAAAAAAAAAGCGAAGAGGAAAAAGACAAACGAAAAACAAAACGAAATAACGCATTGTATGCTG  
GGCCTCAATTGAACTTCTTTGACGTCGACAACAAC

> pGZF3(-600,-1) + yEGFP3 + yCDC28t

GTTGTTGCGGCGCTCCCGGTGGTGAAGTTGATATACTCAAAGATAGGTGAAAGTTGGTTAGTTCTATTGCC  
ACAGCTCGTTCCCGTCATCGCTGAGTTATTGGAAGATGATGATGAAGAGATCGAACGTGAAGTCAGGACCGGTTT  
GGTCAAGGTTGTTGAAAACGTTTTAGGGGAACCTTTTGATAGGTATTTAGATTAGAAAAAAAGGTGAAGTATTA  
TGTAATTTTTGTAAAGTAAACACTATGCTGTTGAACGAAATCTTTCATTGAAAATATTGTTATTCATTCGTGATA  
GCTGCCCTTTCTGAGTTGAACCTAATATTTCAATTACGCTACTTCAAGTTTCAATGAGATATTATTCTGTCATCTT  
CTCGTCGTTCTAGTGATTAACGTTACTAAAATTACTGATCCTAAATAGCGGGCGAACAGAGTGAAAATTTCTTAT  
CTTCGCTTATCTGCGCTTATCAATCCTAATCAGTGAAAAATAAGATATAGGCTTGATAATAAGGTAGTTTGAAAGA  
GAACATATTGCAAGCGGTTGAAGCTATAATACTAGATATACGAATATCATTTGCGGTATTTGTAAGTGTGCTCTACA  
TTCTACTGGTAATATTATGTCTAAAGGTGAAGAATTATTCAGTGGTGTGTCCCAATTTTGTTGAATTAGATGGTG  
ATGTTAATGGTCACAAATTTCTGTCTCCGGTGAAGGTGAAGGTGATGCTACTTACGGTAAATTGACCTTAAATTT  
ATTTGTAAGTGGTAAATTGCCAGTTCCATGGCCAACCTTAGTCACTACTTTAACTTATGGTGTTCATGTTTTCT  
AGATACCCAGATCATATGAAACAACATGACTTTTTCAAGTCTGCCATGCCAGAAGGTTATGTTCAAGAAAGAACTA  
TTTTTTCAAAGATGACGGTAACTACAAGACCAGAGCTGAAGTCAAGTTTGAAGGTGATACCTTAGTTAATAGAAT  
CGAATTAAGGTATTGATTTAAAGAAGATGGTAACATTTAGGTCACAAATTGGAATACAACTATAACTCTCAC  
AATGTTTACATCATGGCTGACAAACAAAAGAATGGTATCAAAGTTAACTTCAAATTAGACACAACATTGAAGATG  
GTTCTGTTCAATTAGCTGACCATTATCAACAAAATACTCCAATTGGTGATGGTCCAGTCTTGTACCAGACAACCAT  
TACTTATCCACTCAATCTGCCTTATCCAAAGATCCAAACGAAAAGAGAGACCACATGGTCTTGTAGAAATTTGTTAC  
TGCTGCTGGTATTACCCATGGTATGGATGAATTGTACAAATAAAGCTTGCATTATAATCTATTTTCGTATTATATT  
ACAAATGCTACTGCACTGTCATTATAGCCTAGTAAAGTATATAGTGAATACAATATACTCAGTTTCAACATTATGAT  
GGGTAACCTCATCAGAAAATATATTCATCGTCATATACGGAACATTCAGTTATACGCGAAAGTAAAAGTGAGAGCT  
TTTCAGGGGTAAAAGCTGGGCGTGTTCCATGACGTATTTACCGAGGTCGTATTATCAAAGAAAATGAAAAAAA  
AAAAAAAAAAAAAAAAAAGCGAAGAGGAAAAAGACAAACGAAAAACAAAACGAAATAACGCATTGTATGCTGGGG  
CCTCAATTGAACTTCTTTGACGTCGACAACAAC

## References for Text S2

1. Winston F, Dollard C, Ricupero-Hovasse SL (1995) Construction of a set of convenient *Saccharomyces cerevisiae* strains that are isogenic to S288C. *Yeast* 11: 53-55.
2. Cormack BP, Bertram G, Egerton M, Gow NA, Falkow S, et al. (1997) Yeast-enhanced green fluorescent protein (yEGFP): a reporter of gene expression in *Candida albicans*. *Microbiology* 143 ( Pt 2): 303-311.
3. Sheff MA, Thorn KS (2004) Optimized cassettes for fluorescent protein tagging in *Saccharomyces cerevisiae*. *Yeast* 21: 661-670.
4. Taxis C, Knop M (2006) System of centromeric, episomal, and integrative vectors based on drug resistance markers for *Saccharomyces cerevisiae*. *Biotechniques* 40: 73-78.
5. Blank LM, Sauer U (2004) TCA cycle activity in *Saccharomyces cerevisiae* is a function of the environmentally determined specific growth and glucose uptake rates. *Microbiology* 150: 1085-1093.
6. Samorski M, Muller-Newen G, Buchs J (2005) Quasi-continuous combined scattered light and fluorescence measurements: a novel measurement technique for shaken microtiter plates. *Biotechnol Bioeng* 92: 61-68.
